# Supplementary material for: DNA-PK inhibition by M3814 enhances chemosensitivity in non-small cell lung cancer
Source: PubMed Central journal article supplement — Acta Pharm Sin B. 2021 Aug 4;11(12):3935–49. doi: 10.1016/j.apsb.2021.07.029 (PMC8727896; doi:10.1016/j.apsb.2021.07.029), 2021-08-04
Supplement: mmc1.pdf [file mmc1.pdf]

## Supporting Information for

### Original article

# DNA-PK inhibition by M3814 enhances chemosensitivity in non-small cell lung cancer

Manni Wang<sup>†</sup>, Siyuan Chen<sup>†</sup>, Yuquan Wei, Xiawei Wei\*

Laboratory of Aging Research and Cancer Drug Target, State Key Laboratory of Biotherapy and Cancer Center, National Clinical Research Center for Geriatrics, West China Hospital, Sichuan University, Chengdu 610000, China

Received 22 April 2021; received in revised form 21 June 2021; accepted 9 July 2021

\*Corresponding author.

E-mail address: [xiaweiwei@scu.edu.cn](mailto:xiaweiwei@scu.edu.cn) (Xiawei Wei).

<sup>†</sup>These authors made equal contributions to this work.

Running title: DNA-PK inhibition by M3814 enhances chemosensitivity in NSCLC

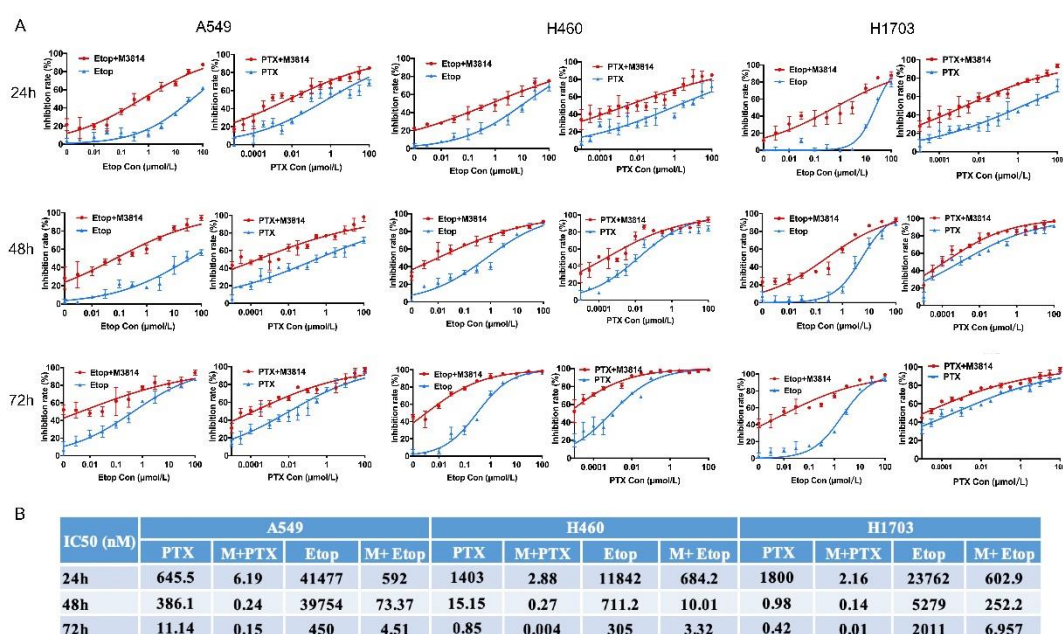

**Figure S1** Synergistic inhibition of M3814 and chemotherapy on NSCLC cell viability and colony formation *in vitro*. (A) Cell viability curves of NSCLC cell lines A549 and H460 treated with paclitaxel/etoposide (0–100 mmol/L) with or without M3814 (5 µmol/L) for 24, 48 and 72 h. Data are presented as mean ± SD ( $n = 3$ ). (B) The IC<sub>50</sub> of chemotherapy on NSCLC cell lines calculated according to CCK-8 assay results.

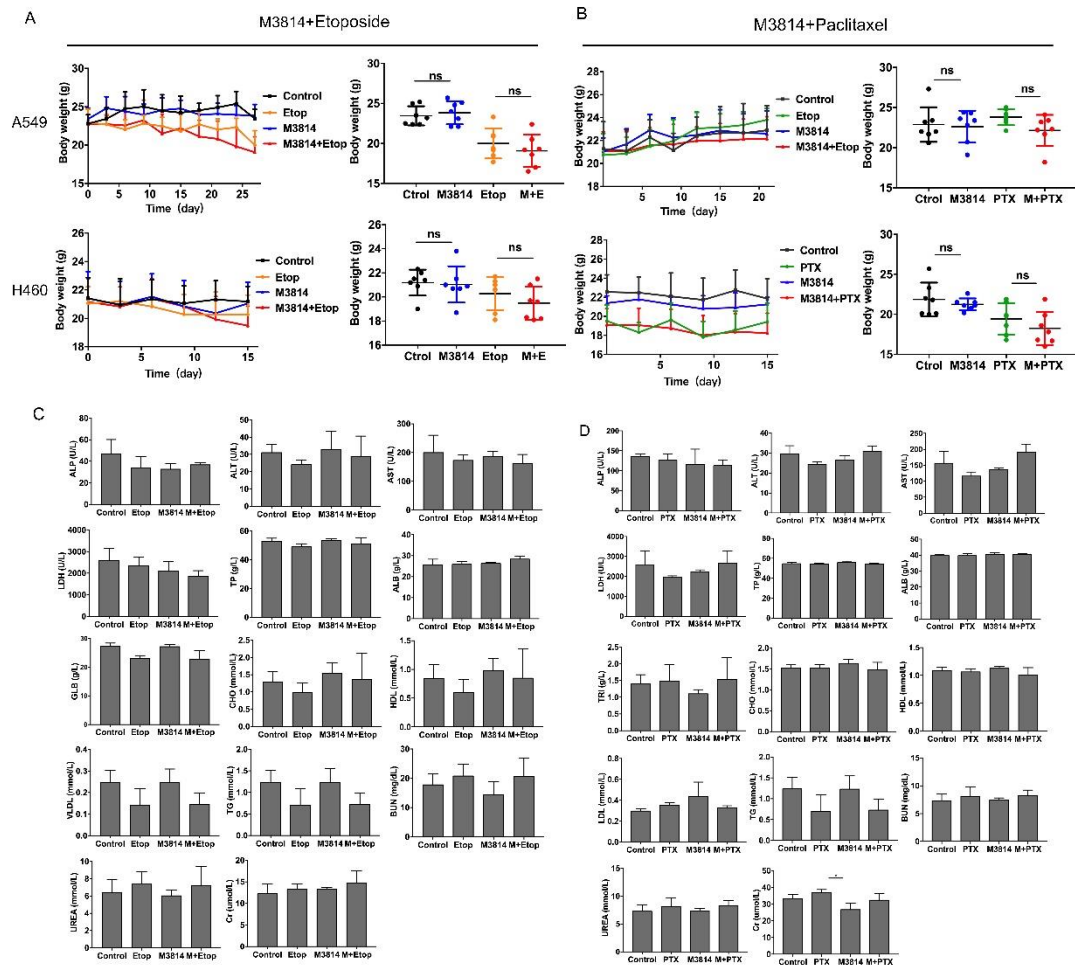

**Figure S2** Toxicity evaluation. (A) and (B) Body weight curves and mean body weight of mice at the end of treatment. Data are presented as mean  $\pm$  SD ( $n = 7$ ; ns,  $P > 0.05$ ). (C) Blood biochemical analysis of mice with indicated treatments. Data are presented as mean  $\pm$  SD ( $n = 3$ ;  $*P < 0.05$ ), with no significant differences in biochemical indexes shown between groups according to ANOVA multiple comparison tests.
